# Supplementary material
Source: Springer Nature journal article supplement (https://www.springermedizin.de/resource/supplementary/12962_2014_211_MOESM1_ESM.pdf/9571916)

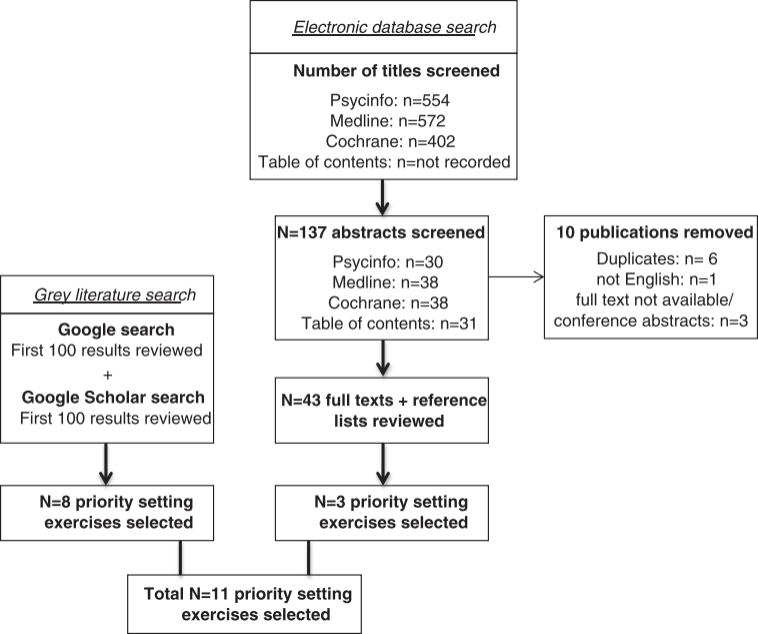

Supplement: MOESM1 [file 9571916]
